# Supplementary material
Source: publisher figshare collection journal article supplement (https://gsajournals.figshare.com/ndownloader/files/28102728)
Supplement: Supplementary file 1 [file 28102728]

## Sheet: Table S1
Table S1. Sources of variation for 15 elemental phenotypes in fresh sweet corn kernels from across locations, only NY, and only WI. The bolded variance component estimates are for significant random effect terms according to a likelihood ratio test (α = 0.05).
	Sources of variationa	Boron	Cadmium	Calcium	Copper	Iron	Magnesium	Manganese	Molybdenum	Nickel	Phosphorus	Potassium	Rubidium	Strontium	Sulfur	Zinc
Across Locations	Env	0.00548475	5.70048e-06	141.444	0.0405997	0.901779	194.321	0.0229814	0.0173865	0.000644277	3264.84	46673.3	0.231646	0.000339943	425.815	1.63839e-06
	Set(Env)	0.0194597	4.56214e-10	21.3905	0.00221159	0.206601	111.177	0.110371	0.00370755	0.000116068	567.925	0.00369792	0.0361293	9.9058e-05	143.049	0.607537
	Block(Set × Env)	0.00338948	9.20126e-08	7.64787e-06	0.0101763	1.63293e-07	1.65204e-05	0.0898475	0.00142795	0.000228914	0.00140914	1.53319e-06	0.0298456	7.21666e-05	1420.6	0.104295
	Geno	0.0479585	4.77857e-05	266.487	0.708723	5.93785	7367.54	2.02347	0.00392236	0.00172404	42195.2	348898	0.174394	0.00397261	13286.9	8.8085
	Geno × Env	0.11674	1.08975e-05	7.94722e-07	0.198469	4.58373	3815.49	0.25509	0.00327331	5.50185e-08	10201.4	2.25639e-06	0.239948	1.06656e-07	8462.24	1.0126e-06
	ICP	0.505442	2.4034e-06	86.7492	0.00382229	0.522688	482.797	0.0321393	0.000565592	0.000434088	10514.4	9124.29	0.00601355	0.00713003	190479	0.419939
	Sample	0.153789	3.14086e-05	617.285	0.23759	3.2784	6013.76	1.7263	0.0110805	0.00219363	47294.3	505798	0.446275	0.00924488	30711.8	13.2914
	Row(Env)	7.62094e-08	2.16729e-07	2.32878e-05	0.0020159	0.00998729	0.000673125	5.04906e-08	0.000788625	0.000108767	332.361	9652.39	1.86027e-07	4.39594e-08	196.146	7.21816e-07
	Column(Env)	0.00508933	8.46028e-07	38.5875	2.83409e-07	0.0969025	0.000108027	0.0909477	0.000205417	5.80687e-05	0.00466623	0.00542026	0.164778	0.00026044	607.272	0.17571
	Sources of variation	Boron	Cadmium	Calcium	Copper	Iron	Magnesium	Manganese	Molybdenum	Nickel	Phosphorus	Potassium	Rubidium	Strontium	Sulfur	Zinc
NY	Env	6.43499e-08	1.02493e-06	20.3479	0.021046	8.22063e-07	108.31	2.39773e-07	0.00139559	6.93333e-05	0.00747699	61002.7	0.0609062	2.67234e-07	0.00129294	1.62854e-06
	Set(Env)	0.0229083	8.92191e-07	23.7368	0.00812552	0.448218	254.034	0.0234237	8.26689e-05	8.34428e-08	2835.42	0.00982392	0.0472221	2.67234e-07	1044.93	1.83443
	Block(Set × Env)	0.0129493	2.22992e-09	9.85834e-05	0.00456272	4.646e-07	175.592	0.0142543	0.00010115	0.000122901	714.46	0.0650373	0.0354644	0.000138902	2251.71	0.305207
	Geno	0.0856631	5.46593e-05	245.7	0.649912	3.45074	6466.43	2.07519	0.00201247	0.00123902	30061.1	290899	0.115336	0.00202723	6555.89	7.8312
	Geno × Env	4.97826e-08	2.49604e-05	3.52391e-06	0.242222	4.43794	660.458	2.08808e-07	0.001829	5.30385e-08	20230	30858.1	2.95066e-07	1.38674e-07	1699.09	5.58123
	ICP	0.481355	4.5952e-06	102.029	0.0119451	0.443062	671.614	0.149348	0.00224093	0.000530444	12043.5	23927.9	0.0141972	0.00770263	225285	0.500201
	Sample	0.246907	3.19157e-05	589.888	0.225353	3.92186	9850.59	1.72333	0.00296595	0.00199356	43852.1	495768	0.744867	0.00660587	42258.6	8.57831
	Row(Env)	1.52178e-07	1.56753e-09	8.7776e-05	4.74946e-07	1.09168e-07	0.00122762	2.39773e-07	3.09671e-05	3.98281e-05	0.00747699	12595.7	4.65027e-07	1.69014e-08	0.00216769	1.62854e-06
	Column(Env)	0.00186298	6.57674e-09	84.5752	6.41308e-08	3.52767e-07	0.000802413	0.12411	0.000253458	9.93209e-05	1819.03	0.0454881	0.214629	0.000346889	636.748	0.408835
	Sources of variation	Boron	Cadmium	Calcium	Copper	Iron	Magnesium	Manganese	Molybdenum	Nickel	Phosphorus	Potassium	Rubidium	Strontium	Sulfur	Zinc
WI	Env	0.0132067	4.42219e-06	6.93903e-05	0.0184416	1.00378e-06	35.4945	2.53479e-07	0.00214119	0.000898499	230.074	95396.2	0.280125	4.04448e-07	0.00115224	1.60796e-06
	Set(Env)	6.62001e-08	5.41625e-10	7.70878	0.0131414	0.305276	3.67681	0.16935	0.00821851	0.000351604	0.00250629	0.0565099	0.115136	0.000125474	0.00115224	0.160137
	Block(Set × Env)	6.62001e-08	1.54274e-06	3.74051	0.0110631	7.14593e-07	0.00112396	0.303637	0.00276037	0.000344098	0.00409052	3224.16	0.0623254	0.000483555	299.235	2.27248e-07
	Geno	0.0996397	4.32394e-05	279.105	0.747981	7.80673	9089.36	2.23574	0.0118266	0.00219222	56254	437803	0.131518	0.0091657	9265.29	8.94419
	Geno × Env	0.119557	6.32661e-06	308.947	0.126893	5.71041	6271.64	0.631479	0.00176632	5.11493e-08	7872.3	5.52207e-07	0.382785	0.00190909	12779.9	8.69194e-07
	ICP	0.532364	4.16201e-07	262.224	0.0148242	0.661406	870.736	0.0362344	0.0129338	0.000428871	14168.8	16960.8	0.222651	0.00570756	178156	0.804079
	Sample	0.0731106	2.20073e-05	222.351	0.278327	1.79682	1703.3	1.21374	0.00898722	0.00247448	32614.4	434345	0.211821	0.00711561	23258.5	11.9348
	Row(Env)	0.00424437	1.3572e-09	2.29062e-05	9.44574e-08	0.246619	368.177	5.61326e-08	0.0009019	8.33067e-05	2332.72	0.0104786	0.0149598	4.37179e-08	139.009	0.172907
	Column(Env)	0.0109013	5.0845e-07	2.42513	9.31866e-08	0.211996	16.1341	2.30107e-07	0.000362348	9.58807e-06	0.000739222	0.00639152	0.0294109	1.4661e-08	1013.13	4.17782e-07
aEnvironment (Env), set within environment [Set(Env)], block within set within environment [Block(Set×Env)], genotype (Geno), genotype-by-environment interaction (Geno×Env), inductively coupled plasma mass spectrometry run (ICP), kernel sample (Sample), row within environment [Row(Env)], column within environment [Col(Env)]
